# Supplementary material for: 稲盛和夫 京セラ会長 : サービス産業中心でいいのか もう一度ものづくりに目覚めよ (The Interviews 1913‣2013 週刊ダイヤモンド100周年経営者発言史) -- (経営者とその時代)
Source: eLife journal article supplement (doi:10.7554/elife.51662), 2014-12-28
Supplement: supp [file elife-51662-supp-v1.zip › elife_poa_e51662_Figure_7_source_data_1.xlsx]

## Sheet: Sheet1
ACACGTGAAAGACGGTGACGGNNGRRT	chr1	2221645	AtACtTGAgAGACtGaGACaGGAGGAT	-	6
ACACGTGAAAGACGGTGACGGNNGRRT	chr1	21046468	AaACGTGAAAGAgGGaaAatGAAGAAT	-	6
ACACGTGAAAGACGGTGACGGNNGRRT	chr1	16016729	ACAgGTGtgAGAtGGTGAtGGCAGAGT	-	5
ACACGTGAAAGACGGTGACGGNNGRRT	chr1	29541612	ACAatTtAtAaAaGGTGACGGCAGGGT	+	6
ACACGTGAAAGACGGTGACGGNNGRRT	chr1	34932292	ACAatTttAAGACaGTGACaGCAGAAT	-	6
ACACGTGAAAGACGGTGACGGNNGRRT	chr1	43074381	ACAgGTGgAtGgCGGgGtCGGGGGAAT	-	6
ACACGTGAAAGACGGTGACGGNNGRRT	chr1	30317900	ggACGgGAAAGgaGGTGAgGGCTGGAT	+	6
ACACGTGAAAGACGGTGACGGNNGRRT	chr1	35567017	ACAaGTGAAAGAtGtgGgCtGGGGAGT	-	6
ACACGTGAAAGACGGTGACGGNNGRRT	chr1	42354134	ACACcTGggAGACtGaGACGGGAGAAT	-	5
ACACGTGAAAGACGGTGACGGNNGRRT	chr1	37301997	tCcCaTGcAAGAgGGTGAgGGGAGAGT	+	6
ACACGTGAAAGACGGTGACGGNNGRRT	chr1	39740580	ACAgcTGcAAGAaGGTGcaGGTGGGAT	-	6
ACACGTGAAAGACGGTGACGGNNGRRT	chr1	56413771	ACAgGTGAgAGAtGGTagCaGCTGGGT	-	6
ACACGTGAAAGACGGTGACGGNNGRRT	chr1	53632484	gCAtGTGAAtGAgtGTGACtGAGGGGT	+	6
ACACGTGAAAGACGGTGACGGNNGRRT	chr1	60421153	AtAgGTGAAAGAgGGTGgCaGGAGAGT	+	5
ACACGTGAAAGACGGTGACGGNNGRRT	chr1	73586460	ACACaTGccAGAtGGaGtCGGGAGAAT	+	6
ACACGTGAAAGACGGTGACGGNNGRRT	chr1	79858891	AgACtTGAAgGAtGGTGAatGTGGGGT	+	6
ACACGTGAAAGACGGTGACGGNNGRRT	chr1	81455785	AaACGTGAAAGACatTGgaGtTAGAGT	+	6
ACACGTGAAAGACGGTGACGGNNGRRT	chr1	109127505	AgACtTGAAAGAattTGAaGGCTGGGT	-	6
ACACGTGAAAGACGGTGACGGNNGRRT	chr1	93496357	cCAgGTGAAAGgCGGaGgtGGGAGGAT	-	6
ACACGTGAAAGACGGTGACGGNNGRRT	chr1	162178356	AaAgGTGAAAGACtGTGACtGCTGAAT	+	4
ACACGTGAAAGACGGTGACGGNNGRRT	chr1	151825530	ACAaGgGAAAcACtGTaACaGGAGAGT	+	6
ACACGTGAAAGACGGTGACGGNNGRRT	chr1	188338704	AgAgtTGAAtGACGGTGAgGtGGGAAT	+	6
ACACGTGAAAGACGGTGACGGNNGRRT	chr1	183773858	AgACtTGAAAcAttGTGAtGGAAGAAT	+	6
ACACGTGAAAGACGGTGACGGNNGRRT	chr1	171281683	ACtCtaGAAtGACaGTGACaGATGAAT	+	6
ACACGTGAAAGACGGTGACGGNNGRRT	chr1	182688635	AaAaGTGAAAGAgGaaGACaGAAGAGT	+	6
ACACGTGAAAGACGGTGACGGNNGRRT	chr1	192079920	AaAaGTGAcAGAgGGaGACaGAAGAGT	-	6
ACACGTGAAAGACGGTGACGGNNGRRT	chr1	192552882	AtACtTaAAAcAtaGTGACGGGAGGAT	-	6
ACACGTGAAAGACGGTGACGGNNGRRT	chr1	203102377	ACAtGTGgAgGAgGGgGAaGGCTGGAT	-	6
ACACGTGAAAGACGGTGACGGNNGRRT	chr1	206913829	ACAgcTGAcAGAaaGTGACaGCGGAGT	-	6
ACACGTGAAAGACGGTGACGGNNGRRT	chr1	220031507	AaAtGTGAAAaACaGTGAaGGATGAGT	+	5
ACACGTGAAAGACGGTGACGGNNGRRT	chr1	217142560	ACACaTGAAAtACaGTattGGTAGGAT	-	6
ACACGTGAAAGACGGTGACGGNNGRRT	chr1	233297480	ACAtGTGtAAGtCtGTGAgGGAGGGGT	+	5
ACACGTGAAAGACGGTGACGGNNGRRT	chr1	227546443	gCAtGTGAcAGAgGGTGcCtGCTGGAT	+	6
ACACGTGAAAGACGGTGACGGNNGRRT	chr1	220762197	ACAtGTcAcAGAttGTGAgGGGCGGGT	-	6
ACACGTGAAAGACGGTGACGGNNGRRT	chr1	239753906	ACACaTGAttGACGaTGttGGAAGAAT	-	6
ACACGTGAAAGACGGTGACGGNNGRRT	chr2	15198411	ACACGaGAAAGgatcTGAgGGAAGAGT	+	6
ACACGTGAAAGACGGTGACGGNNGRRT	chr2	9127213	ttACtTGgAAGACtGaGACGGGAGGAT	+	6
ACACGTGAAAGACGGTGACGGNNGRRT	chr2	19136449	ACACagaAAAaAaGGTGACaGAAGAAT	-	6
ACACGTGAAAGACGGTGACGGNNGRRT	chr2	26572641	ACttGaGAAAGAaGGTGAaaGAGGAAT	+	6
ACACGTGAAAGACGGTGACGGNNGRRT	chr2	41060108	AtAaGTGAAAGAaGGaGtCaGAAGAGT	+	6
ACACGTGAAAGACGGTGACGGNNGRRT	chr2	41656648	ACtCaTGAAgGAaGGTGAaGtAGGGGT	-	6
ACACGTGAAAGACGGTGACGGNNGRRT	chr2	23442402	ACAaGTGAAAGACaGaGACaGGAGAGT	+	4
ACACGTGAAAGACGGTGACGGNNGRRT	chr2	61254159	AgAgaTGAAAGACaaTGACaGCTGAAT	-	6
ACACGTGAAAGACGGTGACGGNNGRRT	chr2	68099437	ACACcTGAgAGgaaGTGACtGAGGGGT	+	6
ACACGTGAAAGACGGTGACGGNNGRRT	chr2	56818634	ACAgtTGAAAGACacaGACtGGTGAAT	+	6
ACACGTGAAAGACGGTGACGGNNGRRT	chr2	80402364	AgAgGTGAgAGAaGcTGAaGGTTGAGT	-	6
ACACGTGAAAGACGGTGACGGNNGRRT	chr2	80521560	AtAtGTGAAAGAgGGaGgCaGGAGAGT	+	6
ACACGTGAAAGACGGTGACGGNNGRRT	chr2	75125700	ACACaTGtAAGACtGTtAtGtGAGAAT	+	6
ACACGTGAAAGACGGTGACGGNNGRRT	chr2	80757406	ACACaTGcAAtgCGGTGgCaGGAGGAT	+	6
ACACGTGAAAGACGGTGACGGNNGRRT	chr2	84434044	ACtCaTGgcAGAaGGTGAaGGGGGAGT	-	6
ACACGTGAAAGACGGTGACGGNNGRRT	chr2	86153116	ACAaGTGAAAGAatGTGAtatTTGAGT	+	6
ACACGTGAAAGACGGTGACGGNNGRRT	chr2	120800847	ACACaTcAgAGAaGGTGtgGGGTGGGT	+	6
ACACGTGAAAGACGGTGACGGNNGRRT	chr2	114884531	AaACGTGgAAGggGGaGACaGAGGAGT	-	6
ACACGTGAAAGACGGTGACGGNNGRRT	chr2	125017689	AtAaaTGAAAGAgGaTGACaGGAGAAT	-	6
ACACGTGAAAGACGGTGACGGNNGRRT	chr2	148482762	ACAaGTGAAAGggGaaGAtGGGAGAAT	-	6
ACACGTGAAAGACGGTGACGGNNGRRT	chr2	137473910	ACtCcTGAAAGtgGGTGAgGaGGGGAT	+	6
ACACGTGAAAGACGGTGACGGNNGRRT	chr2	149369080	AgAgGaGAAAtAgGGTGAaGGGTGAGT	+	6
ACACGTGAAAGACGGTGACGGNNGRRT	chr2	175295618	ACAtGTGAcAaACctTGACaGTGGAGT	-	6
ACACGTGAAAGACGGTGACGGNNGRRT	chr2	170168527	AtAaGTGAAAGAgGGaagCGGGAGAGT	+	6
ACACGTGAAAGACGGTGACGGNNGRRT	chr2	156467576	AaAgGctAAAGAaGGTGACGGAAGGAT	+	5
ACACGTGAAAGACGGTGACGGNNGRRT	chr2	177774973	AtAaGTGAAAGAaGGaGACaGGAGAAT	+	5
ACACGTGAAAGACGGTGACGGNNGRRT	chr2	203976253	ACAaGgGAAAGAgGGaGgCaGGAGAGT	+	6
ACACGTGAAAGACGGTGACGGNNGRRT	chr2	201223293	AgAgGTGAggGACGGTGgaGGAGGAGT	-	6
ACACGTGAAAGACGGTGACGGNNGRRT	chr2	194769064	ACAaGTGAgAGAgGaTGgCaGGAGAGT	+	6
ACACGTGAAAGACGGTGACGGNNGRRT	chr2	183001969	ACcCtTtAAAGAaGaTGAtGGAAGAAT	-	6
ACACGTGAAAGACGGTGACGGNNGRRT	chr2	183018746	ACAaGTGAAAGctGGTtAtGtTAGAGT	+	6
ACACGTGAAAGACGGTGACGGNNGRRT	chr2	204527812	ACtCaTGgAAGAaGGTGAaGtGGGAGT	+	6
ACACGTGAAAGACGGTGACGGNNGRRT	chr2	191793365	AtACGTaAAAGAaGGaGgCaGGAGAGT	-	6
ACACGTGAAAGACGGTGACGGNNGRRT	chr2	229992547	AaAtGTGAAtGAgtGTGACGaGAGGGT	-	6
ACACGTGAAAGACGGTGACGGNNGRRT	chr2	219256659	AtAaGTGAAAGAaGGaGgCaGGAGGGT	+	6
ACACGTGAAAGACGGTGACGGNNGRRT	chr2	222558425	ACACGgGgAAGAgGGgGctGGCCGAGT	-	6
ACACGTGAAAGACGGTGACGGNNGRRT	chr2	227239742	tCAgGTGcAAGAaGGTGcCtGGGGAGT	-	6
ACACGTGAAAGACGGTGACGGNNGRRT	chr3	4333084	AaACtTGAAgGAtGGTGAatGTGGGGT	-	6
ACACGTGAAAGACGGTGACGGNNGRRT	chr3	7763585	ACAacTGAAAGcCaGTGcCGtCTGAGT	-	6
ACACGTGAAAGACGGTGACGGNNGRRT	chr3	7915324	AgACtTGAAtGAtGGTGAatGCTGGGT	-	6
ACACGTGAAAGACGGTGACGGNNGRRT	chr3	14911003	ACAaGTGgAAtAgGGTGAgaGGAGAGT	+	6
ACACGTGAAAGACGGTGACGGNNGRRT	chr2	240258559	cCAgcTcAgAGACGGaGACGGCAGAGT	+	6
ACACGTGAAAGACGGTGACGGNNGRRT	chr3	33796363	ACcCaTGgAAGAgGGTGggGGATGGGT	-	6
ACACGTGAAAGACGGTGACGGNNGRRT	chr3	37458651	ACgCGTGAAtcACtGTGttGGGAGGGT	+	6
ACACGTGAAAGACGGTGACGGNNGRRT	chr3	38996923	AgAtGTGAttGgCGGTGAaGGAAGAAT	-	6
ACACGTGAAAGACGGTGACGGNNGRRT	chr3	36713435	ACACGTGAAAGAgGcTGgaaGCTGGAT	-	5
ACACGTGAAAGACGGTGACGGNNGRRT	chr3	54666771	ACAtGTGAttcAgGGTGACtGGGGGAT	+	6
ACACGTGAAAGACGGTGACGGNNGRRT	chr3	63988854	AtACcTcAgAGACaGTGAtGGTGGAAT	+	6
ACACGTGAAAGACGGTGACGGNNGRRT	chr3	49092390	AtACaTGcAAcAtGGTGACtGGTGAGT	-	6
ACACGTGAAAGACGGTGACGGNNGRRT	chr3	71223023	tCAgGaGAAAGAtGaTGACaGCTGGAT	-	6
ACACGTGAAAGACGGTGACGGNNGRRT	chr3	65502773	AaAgGTGAgAGAgGGaGACaGAAGGGT	+	6
ACACGTGAAAGACGGTGACGGNNGRRT	chr3	72875399	ACACGTGggAGtCtGaGgCGGGCGGAT	+	6
ACACGTGAAAGACGGTGACGGNNGRRT	chr3	76621534	ACACtTGgtAGAtGGTGAaGtTAGGAT	-	6
ACACGTGAAAGACGGTGACGGNNGRRT	chr3	116134704	taAtGTGAAAGAgaGTGACtGGAGGAT	-	6
ACACGTGAAAGACGGTGACGGNNGRRT	chr3	120458873	ACACagaAAAGAaGGTGAtGtGAGGAT	+	6
ACACGTGAAAGACGGTGACGGNNGRRT	chr3	120710238	AgACaTGAAAGAgGGTaAaaGGTGGAT	-	6
ACACGTGAAAGACGGTGACGGNNGRRT	chr3	126664409	gCAgGTGAAAGtCGGTGtCtGGAGAGT	+	5
ACACGTGAAAGACGGTGACGGNNGRRT	chr3	134174824	ACAaaaGgAAGAgGaTGACGGGGGGAT	+	6
ACACGTGAAAGACGGTGACGGNNGRRT	chr3	131910734	ACACtTGgAAGtCctTGAgGGAGGGAT	+	6
ACACGTGAAAGACGGTGACGGNNGRRT	chr3	143589797	cCAaGgGAAAGcCtGTGACtGGGGAGT	+	6
ACACGTGAAAGACGGTGACGGNNGRRT	chr3	153028061	ACAaGTGAAtGAaGcTGAaaGGTGAAT	-	6
ACACGTGAAAGACGGTGACGGNNGRRT	chr3	177832983	ACAtGTGtAAagCaGTGAgGGCTGAGT	-	6
ACACGTGAAAGACGGTGACGGNNGRRT	chr3	182109366	AaAtGTGAAAGAgGGaGgCaGAAGAGT	+	6
ACACGTGAAAGACGGTGACGGNNGRRT	chr3	187317302	AaACGaGAAAGAgGaTGAaGGCTGAAT	-	5
ACACGTGAAAGACGGTGACGGNNGRRT	chr4	4426717	gCAaGTGAgAaACGGTGAgGGTGGAAT	-	5
ACACGTGAAAGACGGTGACGGNNGRRT	chr3	197487633	cCACcTGAAAGgCtGaGAtGGGAGAAT	+	6
ACACGTGAAAGACGGTGACGGNNGRRT	chr3	194730099	AgACGTGAggGAtGaaGACGGGTGAGT	+	6
ACACGTGAAAGACGGTGACGGNNGRRT	chr3	196228362	AtAgGccAAAGcCaGTGACGGAAGGGT	+	6
ACACGTGAAAGACGGTGACGGNNGRRT	chr4	5905958	tCACGTtAcAGAgGGTGACatAGGAAT	+	6
ACACGTGAAAGACGGTGACGGNNGRRT	chr4	3204869	cCACcTGAgAGACtGaGAaGGGAGGAT	+	6
ACACGTGAAAGACGGTGACGGNNGRRT	chr4	6015918	ACAtGTcAAgGAtGGTGACatGGGGAT	-	6
ACACGTGAAAGACGGTGACGGNNGRRT	chr4	1711544	ACACGTGgAAGtCaGgGACacCCGAGT	-	6
ACACGTGAAAGACGGTGACGGNNGRRT	chr4	7725240	ACcaGTagAAGACGGTGAgGtTAGGGT	-	6
ACACGTGAAAGACGGTGACGGNNGRRT	chr4	12222588	ACAgtTGAAAGgCtGTaAtGGGAGAAT	+	6
ACACGTGAAAGACGGTGACGGNNGRRT	chr4	26817854	cCACtTGAAAGgCtGaGACaGGAGAAT	+	6
ACACGTGAAAGACGGTGACGGNNGRRT	chr4	25430038	AgAatTtcAAGACGGTGACaGCAGAGT	-	6
ACACGTGAAAGACGGTGACGGNNGRRT	chr4	22681327	ctACGTGgAAGACtGaGACaGGAGAAT	-	6
ACACGTGAAAGACGGTGACGGNNGRRT	chr4	43904927	ACAaGaGgtAGAaGGTGAaGGGAGGAT	+	6
ACACGTGAAAGACGGTGACGGNNGRRT	chr4	42721526	AgAtGTGtAAGAgGGaGACaGAGGAAT	-	6
ACACGTGAAAGACGGTGACGGNNGRRT	chr4	54121095	gCACtTGtgAGgCGGaGACGGGCGGAT	-	6
ACACGTGAAAGACGGTGACGGNNGRRT	chr4	83392974	AtAaGTGAAAGcaGGaGACaGGCGAGT	-	6
ACACGTGAAAGACGGTGACGGNNGRRT	chr4	55432966	ACACtTaAAAGAtGGTGAactGTGAGT	-	6
ACACGTGAAAGACGGTGACGGNNGRRT	chr4	40250779	AaAgGTGAAAGAtGGaaAtGGAAGAGT	-	6
ACACGTGAAAGACGGTGACGGNNGRRT	chr4	75905438	gCACGTGAAAGgCcGaGgtGGGTGGAT	+	6
ACACGTGAAAGACGGTGACGGNNGRRT	chr4	105263862	AaAaGTGAAAGAgGGaGAtGGATGGAT	+	5
ACACGTGAAAGACGGTGACGGNNGRRT	chr4	101173531	cCACtaGAAAGACaGTGAtGtCAGGAT	+	6
ACACGTGAAAGACGGTGACGGNNGRRT	chr4	95596893	ACACGTGcAgGAttGTtACaGAGGGAT	-	6
ACACGTGAAAGACGGTGACGGNNGRRT	chr4	102028869	ACAgaTGAAAGACacTGAaaGTAGAGT	-	6
ACACGTGAAAGACGGTGACGGNNGRRT	chr4	120272972	ACcCaTGAAAtACaGTGACtGAAGAGT	+	5
ACACGTGAAAGACGGTGACGGNNGRRT	chr4	138345524	AaACtTGAAAGAgGGaGgCcGAAGAGT	+	6
ACACGTGAAAGACGGTGACGGNNGRRT	chr4	143682972	ACAaGTGAAAGAgGGaGACaGGGGAGT	+	4
ACACGTGAAAGACGGTGACGGNNGRRT	chr4	158697423	ACAaGTGAAAaACtGTGAtatAAGAAT	-	6
ACACGTGAAAGACGGTGACGGNNGRRT	chr5	411974	AtgCGcGAAAGACGGTGgCctCTGAGT	-	6
ACACGTGAAAGACGGTGACGGNNGRRT	chr5	28216755	ACACtTGgAAGgCtGaGgCGGGAGAAT	+	6
ACACGTGAAAGACGGTGACGGNNGRRT	chr5	10755117	gaAtGTGAAAGAgGGaGgCGGAAGAGT	+	6
ACACGTGAAAGACGGTGACGGNNGRRT	chr5	32318849	ctACtTGAgAGACtGaGACGGGAGGAT	-	6
ACACGTGAAAGACGGTGACGGNNGRRT	chr5	11139973	ACAtGTGAAAGAgGGaGgCaGAAGAGT	-	5
ACACGTGAAAGACGGTGACGGNNGRRT	chr5	56607749	ACAgGgGAgAGcaGGaGACGGATGAGT	+	6
ACACGTGAAAGACGGTGACGGNNGRRT	chr5	44918471	AaACGTGAAtaACGGaGgCaGAAGAGT	-	6
ACACGTGAAAGACGGTGACGGNNGRRT	chr5	58779488	ctACtTGgAAGACtGTGACaGGAGGAT	-	6
ACACGTGAAAGACGGTGACGGNNGRRT	chr5	43778752	AtACaTGAAAtAaaGTGACGcTGGGAT	-	6
ACACGTGAAAGACGGTGACGGNNGRRT	chr5	50675408	ttACtTGAgAGACtGaGACGGGAGAAT	-	6
ACACGTGAAAGACGGTGACGGNNGRRT	chr5	57581049	AtAaGTGAAAGAgGGaGgCaGGAGAGT	-	6
ACACGTGAAAGACGGTGACGGNNGRRT	chr5	68181712	ACACcTGAgAGAtGcTGAaGtTGGGGT	-	6
ACACGTGAAAGACGGTGACGGNNGRRT	chr5	68940028	AaACaTGtAAGAaGGTaAtGGATGAAT	+	6
ACACGTGAAAGACGGTGACGGNNGRRT	chr5	62661108	ACACtTGAAgGAtGGTGAatGCAGGGT	-	5
ACACGTGAAAGACGGTGACGGNNGRRT	chr5	100268479	gCAtGTGAAAGAaaGTaAgGGTTGGGT	-	6
ACACGTGAAAGACGGTGACGGNNGRRT	chr5	84645819	ACACcgGcAgGcCGtTGACGGCGGAAT	+	6
ACACGTGAAAGACGGTGACGGNNGRRT	chr5	113612954	ACACtTGgAAGAgGGTcAaGtGGGAAT	+	6
ACACGTGAAAGACGGTGACGGNNGRRT	chr5	92771410	ACACGTGAAAGAgGGaGgCaaGAGAGT	-	5
ACACGTGAAAGACGGTGACGGNNGRRT	chr5	111333865	AtACcTGtAAGACaGTGgCtGTAGAAT	+	6
ACACGTGAAAGACGGTGACGGNNGRRT	chr5	113028890	ACAgGTGgAgGgCGGTGggGGCTGGGT	+	6
ACACGTGAAAGACGGTGACGGNNGRRT	chr5	139384934	ACAgGTGAAgGAtGGaGggGGCTGAGT	+	6
ACACGTGAAAGACGGTGACGGNNGRRT	chr5	154888373	AggCcTGAAAGACGaTGACatGAGGAT	+	6
ACACGTGAAAGACGGTGACGGNNGRRT	chr5	132027881	AtACtTGAAAGAaGaaGAaGGAGGGAT	-	6
ACACGTGAAAGACGGTGACGGNNGRRT	chr5	166990314	AtcCGTGggAGACaGTGAtGGAAGGAT	-	6
ACACGTGAAAGACGGTGACGGNNGRRT	chr5	166167263	AtACtTGgAAGACtGaGAtGGGAGGAT	+	6
ACACGTGAAAGACGGTGACGGNNGRRT	chr5	174936022	cCACcTGgAAGAacGgGACGGGTGGGT	+	6
ACACGTGAAAGACGGTGACGGNNGRRT	chr5	151611467	ACACcatAgAcACGGTGACaGCCGGAT	+	6
ACACGTGAAAGACGGTGACGGNNGRRT	chr6	7760783	ACAtGTGAAAGtaGaTGtCtGGTGAAT	+	6
ACACGTGAAAGACGGTGACGGNNGRRT	chr5	179523384	AgACaaGAAAGAgGGTGcaGGCCGGGT	-	6
ACACGTGAAAGACGGTGACGGNNGRRT	chr5	179644091	AgACaaGAAAGAgGGTGcaGGCCGGGT	+	6
ACACGTGAAAGACGGTGACGGNNGRRT	chr6	1508428	cCACtTGggAGACGGaGgCGGGAGGAT	-	6
ACACGTGAAAGACGGTGACGGNNGRRT	chr6	3190473	ACACaTcAAtGctGGTGAgGGCGGAGT	+	6
ACACGTGAAAGACGGTGACGGNNGRRT	chr6	12900229	ACAacaGAAAGAgGGgGAaGGAGGGAT	-	6
ACACGTGAAAGACGGTGACGGNNGRRT	chr6	20799762	ACAtGTGcAcGAaGGTaAgGGGAGGAT	-	6
ACACGTGAAAGACGGTGACGGNNGRRT	chr6	17247933	ctAtGTGAAAGACGGTGtCaaGAGAAT	-	6
ACACGTGAAAGACGGTGACGGNNGRRT	chr6	40135706	cCACGTGgAAGctGcTGAaGGGAGGGT	+	6
ACACGTGAAAGACGGTGACGGNNGRRT	chr6	41569745	ACAgGTcAgcGAgGGTcACGGGAGGGT	+	6
ACACGTGAAAGACGGTGACGGNNGRRT	chr6	31901687	AaACGTGtAAGggGGgGgCGGAGGAAT	-	6
ACACGTGAAAGACGGTGACGGNNGRRT	chr6	40591902	AgAaGaGAAAGAaGGaGAaGGCAGAGT	+	6
ACACGTGAAAGACGGTGACGGNNGRRT	chr6	66460155	gCAtGTGAgAGAaGGaGAgGGCAGAAT	-	6
ACACGTGAAAGACGGTGACGGNNGRRT	chr6	52636745	AgACGTtAAtGAaGGTtAtGGCTGGGT	+	6
ACACGTGAAAGACGGTGACGGNNGRRT	chr6	51995078	gCAgGTGAAAaAgGaTGAaGGATGAGT	-	6
ACACGTGAAAGACGGTGACGGNNGRRT	chr6	86982458	ACACcTGcAAGgaaGTGACaGAAGAAT	+	6
ACACGTGAAAGACGGTGACGGNNGRRT	chr6	108324632	gCAaGaGcAAGgCGGTGtCGGCAGAAT	-	6
ACACGTGAAAGACGGTGACGGNNGRRT	chr6	96892025	ACACGTGAAAtAatGTGgtGaGTGGAT	-	6
ACACGTGAAAGACGGTGACGGNNGRRT	chr6	119479311	ACAaGTGAAAaACGGgtgCaGAAGAAT	-	6
ACACGTGAAAGACGGTGACGGNNGRRT	chr6	136028697	ACAtGTGgAAGAgGGaGgCaGAAGAGT	-	6
ACACGTGAAAGACGGTGACGGNNGRRT	chr6	138936562	ACACacGAcAGAgaGaGACGGCAGGGT	+	6
ACACGTGAAAGACGGTGACGGNNGRRT	chr6	153991713	cCAgGTGAAAGAtaaTGACGaCTGAGT	-	6
ACACGTGAAAGACGGTGACGGNNGRRT	chr6	167549319	gCACGTGAcAGgCaGTGggGGCTGGGT	-	6
ACACGTGAAAGACGGTGACGGNNGRRT	chr6	167664030	ACAgGTGcAgGAtGcTGAgGGCTGAGT	+	6
ACACGTGAAAGACGGTGACGGNNGRRT	chr6	161399230	ggACtTGAAgGAtGGTGACtGCAGGGT	-	6
ACACGTGAAAGACGGTGACGGNNGRRT	chr6	168106458	ACACGTGAAgGAaGGaGggGcAGGAAT	+	6
ACACGTGAAAGACGGTGACGGNNGRRT	chr6	158276408	ctACtTGAgAGACtGaGACGGGAGGAT	-	6
ACACGTGAAAGACGGTGACGGNNGRRT	chr6	165884053	gCAgGTGgAgGAaGGTGAtGGGAGGGT	+	6
ACACGTGAAAGACGGTGACGGNNGRRT	chr7	16792020	AaACGTGAAAGgCtGTGgCatCAGGGT	-	6
ACACGTGAAAGACGGTGACGGNNGRRT	chr6	156926600	AgAgGTGAAAcAaGaTGAaGGTGGAGT	-	6
ACACGTGAAAGACGGTGACGGNNGRRT	chr7	24194897	ACAttTGAAAGAaGGTGgaGaTGGGAT	-	6
ACACGTGAAAGACGGTGACGGNNGRRT	chr7	28452523	AgACtTGAAtGAaGGTGAgGGTAGGAT	+	5
ACACGTGAAAGACGGTGACGGNNGRRT	chr7	40036633	AaAaGTGAAAGAtGGgGACacTGGGGT	-	6
ACACGTGAAAGACGGTGACGGNNGRRT	chr7	40102131	ACACtTGggAGACtGaGgCGGGTGGAT	+	6
ACACGTGAAAGACGGTGACGGNNGRRT	chr7	45214162	ACACtTGtAAtACtGTaAgGGGTGAGT	-	6
ACACGTGAAAGACGGTGACGGNNGRRT	chr7	29233628	AaAtGTGAAAGAgGGaGACaGAAGGGT	+	5
ACACGTGAAAGACGGTGACGGNNGRRT	chr7	53643956	gCAgGTGgAAGACaGTGAgGcAAGAGT	+	6
ACACGTGAAAGACGGTGACGGNNGRRT	chr7	54078552	ACgCtTGAAAGtCaGTGACtGTTGAAT	-	5
ACACGTGAAAGACGGTGACGGNNGRRT	chr7	56658656	tCACGgGtAAGACGGTGAtttTTGAAT	+	6
ACACGTGAAAGACGGTGACGGNNGRRT	chr7	57770216	cCAtGgGAAgcACtGTGACGGGAGAAT	-	6
ACACGTGAAAGACGGTGACGGNNGRRT	chr7	108590549	AaAtGgGAAgGAgGGaGACGGAAGAAT	+	6
ACACGTGAAAGACGGTGACGGNNGRRT	chr7	98687247	gCACaTaAAAccCGGTGACtGTGGAAT	-	6
ACACGTGAAAGACGGTGACGGNNGRRT	chr7	98737111	ACACGTtAAgGACGcTGAgaaTGGAGT	+	6
ACACGTGAAAGACGGTGACGGNNGRRT	chr7	106198405	ACACtTGAgAGgCtGaGAtGGGAGGAT	-	6
ACACGTGAAAGACGGTGACGGNNGRRT	chr7	134854567	ACACGctActGAaGGTcACGGCGGGAT	+	6
ACACGTGAAAGACGGTGACGGNNGRRT	chr7	158692493	cCACGTGggAGgCtGaGACGGGTGGAT	+	6
ACACGTGAAAGACGGTGACGGNNGRRT	chr8	2467067	tCACGTGAgAaAtGcTGACaGAAGAAT	+	6
ACACGTGAAAGACGGTGACGGNNGRRT	chr8	1314572	ACACcTGAgAGgCGGTGACacAGGAGT	-	5
ACACGTGAAAGACGGTGACGGNNGRRT	chr7	152683408	ACACGaGAggGcaGGgGACGGGAGAGT	+	6
ACACGTGAAAGACGGTGACGGNNGRRT	chr7	142775592	ACttGgGAcAGAaGGTGAaGGTGGAAT	-	6
ACACGTGAAAGACGGTGACGGNNGRRT	chr7	138695674	cCAaGaGAAAaAgGGTGACGtTAGAAT	+	6
ACACGTGAAAGACGGTGACGGNNGRRT	chr7	158236414	ACACcaGAcAaACGtTGAgGGGTGGGT	+	6
ACACGTGAAAGACGGTGACGGNNGRRT	chr7	141915711	ACAgGTGgAgaACtGTGAaGGAAGGGT	-	6
ACACGTGAAAGACGGTGACGGNNGRRT	chr7	153005482	ACAaGTGAgAGAaGGTagaGGAAGAGT	-	6
ACACGTGAAAGACGGTGACGGNNGRRT	chr7	154725459	gCAaGaGAAAGAgaGTGAaGGGGGAGT	+	6
ACACGTGAAAGACGGTGACGGNNGRRT	chr8	2254643	tCACGTGAgAaAtGcTGACaGAAGAAT	-	6
ACACGTGAAAGACGGTGACGGNNGRRT	chr8	28119384	ACACGcGAgAGACacTGAtGaATGGAT	-	6
ACACGTGAAAGACGGTGACGGNNGRRT	chr8	28147025	AtAatTtcAAGACGGTGACaGCAGAAT	-	6
ACACGTGAAAGACGGTGACGGNNGRRT	chr8	15074122	ACAtcTGggAGtCaGTGACGGTTGGAT	-	6
ACACGTGAAAGACGGTGACGGNNGRRT	chr8	22139285	gCAgGgGtgAGAaGGTGACGGGGGGGT	-	6
ACACGTGAAAGACGGTGACGGNNGRRT	chr8	10676047	ACACGTGAAAGgatGcttCGGTGGGGT	+	6
ACACGTGAAAGACGGTGACGGNNGRRT	chr8	52840944	AaACaTGAAAcACGaTtAaGGATGAAT	+	6
ACACGTGAAAGACGGTGACGGNNGRRT	chr8	33000407	ACACtTGAAAaAtGaTcAgGGTTGAAT	-	6
ACACGTGAAAGACGGTGACGGNNGRRT	chr8	55160349	AaAgGTGAgAGACaGTGAgGaGGGAGT	+	6
ACACGTGAAAGACGGTGACGGNNGRRT	chr8	37413845	ACtCaTGgcAGAaGGTGAaGGGGGAGT	-	6
ACACGTGAAAGACGGTGACGGNNGRRT	chr8	60538806	tCACtTGAAgGACaGTGAaGGGTGGAT	+	5
ACACGTGAAAGACGGTGACGGNNGRRT	chr8	65988653	ACACtTGAgAGgCtGaGAtGGGAGAAT	+	6
ACACGTGAAAGACGGTGACGGNNGRRT	chr8	85605549	ACtCGTGAAAGACtaTtttGGGGGAAT	-	6
ACACGTGAAAGACGGTGACGGNNGRRT	chr8	107881122	ACAttTGtAAGACtGTGACtaCTGAAT	+	6
ACACGTGAAAGACGGTGACGGNNGRRT	chr8	109610181	ACAaGTaAAAcAaGGTaACtGGAGAGT	-	6
ACACGTGAAAGACGGTGACGGNNGRRT	chr8	123682707	ACACGgGcAgGAaGGTGgaGGGTGGGT	+	6
ACACGTGAAAGACGGTGACGGNNGRRT	chr8	127024776	ACAaGTGAAgGgaGGgGACaGAAGAGT	+	6
ACACGTGAAAGACGGTGACGGNNGRRT	chr8	118521232	AaAtGTGAcAGACaGTGAgtGCTGGGT	-	6
ACACGTGAAAGACGGTGACGGNNGRRT	chr8	141855275	tCACcTtgAgGAtGGTGACGGGGGAAT	+	6
ACACGTGAAAGACGGTGACGGNNGRRT	chr9	10222989	AgAaGTGAAAGACaGaGAatGAAGAGT	+	6
ACACGTGAAAGACGGTGACGGNNGRRT	chr8	144074674	ctACtTGAgAGACtGaGACGGGAGGGT	-	6
ACACGTGAAAGACGGTGACGGNNGRRT	chr9	21834644	ACAtGTGgAAGACGGaGgCaGAAGAGT	-	5
ACACGTGAAAGACGGTGACGGNNGRRT	chr9	30253648	AtgCGTGAAAGAgGGaGgCaGGAGAGT	-	6
ACACGTGAAAGACGGTGACGGNNGRRT	chr9	32668984	gCACGgGAAtGAgGGcGAtGGTGGAAT	-	6
ACACGTGAAAGACGGTGACGGNNGRRT	chr9	77470426	caAtGTGAAccAtGGTGACGGTAGAAT	+	6
ACACGTGAAAGACGGTGACGGNNGRRT	chr9	78228131	AgAtGTGAAAGgCcGaGAtGGGAGGGT	-	6
ACACGTGAAAGACGGTGACGGNNGRRT	chr9	83461191	AgACGTGgAAGAaGGgaACaGAGGAGT	+	6
ACACGTGAAAGACGGTGACGGNNGRRT	chr9	92728843	cCACGTGgAgGACaGTGgCaGTGGAGT	+	6
ACACGTGAAAGACGGTGACGGNNGRRT	chr9	103532876	AaACGTGAAAcAaGGTtAaGaGTGAGT	+	6
ACACGTGAAAGACGGTGACGGNNGRRT	chr9	115299707	tCACaTGAgAGAtGGTGgtGGCTGAAT	+	6
ACACGTGAAAGACGGTGACGGNNGRRT	chr9	106164169	AgACtTcAAAaACGaTGAaGGAGGGGT	+	6
ACACGTGAAAGACGGTGACGGNNGRRT	chr9	115522556	ACAtGTGcAAGgCaGaGAtGGCTGAAT	-	6
ACACGTGAAAGACGGTGACGGNNGRRT	chr9	130153812	ACAgGTGAAAtAtGGaGACGGGGGAGT	-	4
ACACGTGAAAGACGGTGACGGNNGRRT	chr10	3915102	gCACGTctAAGAaGGTGACacTTGAAT	-	6
ACACGTGAAAGACGGTGACGGNNGRRT	chr9	137209215	ACAgGaGAAAGAgGcTGAaGaCTGAGT	+	6
ACACGTGAAAGACGGTGACGGNNGRRT	chr9	132212327	ACACaacAcAGAgGcTGACGGGCGGGT	-	6
ACACGTGAAAGACGGTGACGGNNGRRT	chr9	137397276	gCcCGTGAAAGctGGaGAaGGTTGAGT	+	6
ACACGTGAAAGACGGTGACGGNNGRRT	chr9	135860676	ACACcTtAAAGAaGacGgCGGAGGGGT	-	6
ACACGTGAAAGACGGTGACGGNNGRRT	chr9	125355966	ACAgGTGAAAaAtGGTaACcaATGAAT	-	6
ACACGTGAAAGACGGTGACGGNNGRRT	chr10	2383597	cCACtTcAgAGAtGGTGAgGGGAGGGT	+	6
ACACGTGAAAGACGGTGACGGNNGRRT	chr10	7402075	ACACagGcAAGAtGGTGACtaCTGAGT	+	6
ACACGTGAAAGACGGTGACGGNNGRRT	chr10	21311929	AaAtGTGAAAGAgGGaGAgGGAGGAGT	-	5
ACACGTGAAAGACGGTGACGGNNGRRT	chr10	31484107	AaAaGTGAAAGAgaGTGAgGcAGGAGT	-	6
ACACGTGAAAGACGGTGACGGNNGRRT	chr10	22898570	ACtCGgGAAAGAgtGgGAtGGTGGGGT	+	6
ACACGTGAAAGACGGTGACGGNNGRRT	chr10	42818937	cCAtGTtAActACGGTGAaGGCAGAGT	+	6
ACACGTGAAAGACGGTGACGGNNGRRT	chr10	56773490	cCACGTGAAAaACtGTGtCtcCAGAGT	-	6
ACACGTGAAAGACGGTGACGGNNGRRT	chr10	56032605	AaAtGTGAAAaACtGTtACtGATGAAT	+	6
ACACGTGAAAGACGGTGACGGNNGRRT	chr10	69775502	ACAgGaGAAAagCGGgGcCGGTAGGAT	+	6
ACACGTGAAAGACGGTGACGGNNGRRT	chr10	66454013	ACAgGTGAAAGAgaGaGgCaGAAGAGT	+	6
ACACGTGAAAGACGGTGACGGNNGRRT	chr10	57948978	AaAtGcGtAAGACtGTaACGGTTGGGT	-	6
ACACGTGAAAGACGGTGACGGNNGRRT	chr10	93125550	AatCGTGgcAGAaGGTGAaGGGGGAAT	+	6
ACACGTGAAAGACGGTGACGGNNGRRT	chr10	105904317	ACAtGaGAAAGggGGTtAgGGTTGAGT	+	6
ACACGTGAAAGACGGTGACGGNNGRRT	chr10	113352688	gCACcTGAAAGAaaGTGACGGCTGAGT	+	4
ACACGTGAAAGACGGTGACGGNNGRRT	chr10	105177990	taACcTGAAAaACGGTtACaGAAGAGT	+	6
ACACGTGAAAGACGGTGACGGNNGRRT	chr11	3675568	AgAaGTGAAtGcCtGTcACGGAGGGAT	-	6
ACACGTGAAAGACGGTGACGGNNGRRT	chr11	9616728	cCACtTGAAAGgCtGgGACcGGAGGAT	-	6
ACACGTGAAAGACGGTGACGGNNGRRT	chr11	23443773	AaAaGTGAAAGAaGGaGACaaGAGAGT	-	6
ACACGTGAAAGACGGTGACGGNNGRRT	chr11	40596109	ACAgaTGAAAaACaaTGACaGCTGGGT	+	6
ACACGTGAAAGACGGTGACGGNNGRRT	chr11	27027585	ACtCaTGgcAGAaGGTGAaGGGGGAGT	-	6
ACACGTGAAAGACGGTGACGGNNGRRT	chr11	65348036	ACACtTGAgAGgCtGaGgCGGGAGGAT	+	6
ACACGTGAAAGACGGTGACGGNNGRRT	chr11	50147463	AgAtGTGAgAGAaGtTGAaGGCAGGGT	-	6
ACACGTGAAAGACGGTGACGGNNGRRT	chr11	74447595	AtAatTtAAAGAtGGTGACaGCAGAGT	-	6
ACACGTGAAAGACGGTGACGGNNGRRT	chr11	87777904	ACAtGTGtAAGAtGGgGAatGCAGGAT	-	6
ACACGTGAAAGACGGTGACGGNNGRRT	chr11	88017003	ACACtTGgAAGAaGGTGcCccTAGGGT	+	6
ACACGTGAAAGACGGTGACGGNNGRRT	chr11	89821923	ACAacTccAAGACGGTGAaGtAAGAAT	+	6
ACACGTGAAAGACGGTGACGGNNGRRT	chr11	91093027	ACACcTGggAGgCcGaGACGGGCGGAT	-	6
ACACGTGAAAGACGGTGACGGNNGRRT	chr11	90022640	ACAacTccAAGACGGTGAaGtAAGAAT	-	6
ACACGTGAAAGACGGTGACGGNNGRRT	chr11	97838716	ACACGTGAAAaAtGtTttaGGTGGAAT	-	6
ACACGTGAAAGACGGTGACGGNNGRRT	chr11	106091644	AtACtTGAAAGAaGtTGAaaGATGAGT	+	6
ACACGTGAAAGACGGTGACGGNNGRRT	chr11	103491975	tCACtaGAAAGACaGTGAttGGAGGAT	-	6
ACACGTGAAAGACGGTGACGGNNGRRT	chr11	108669761	AgAtGTGgAAGAgGGaGgCGGAAGAGT	+	6
ACACGTGAAAGACGGTGACGGNNGRRT	chr11	127237262	ACAtGTGcAAaACaGTGAaGcTGGAAT	+	6
ACACGTGAAAGACGGTGACGGNNGRRT	chr12	5550260	AatCGTGgAgGAaGGTGAaGGGGGAGT	-	6
ACACGTGAAAGACGGTGACGGNNGRRT	chr11	134584310	ACACaTGAAAtAgGGcatCGGTGGGAT	-	6
ACACGTGAAAGACGGTGACGGNNGRRT	chr12	12116815	tCAatTGAAAGAgGGTGAgGGTAGAGT	+	5
ACACGTGAAAGACGGTGACGGNNGRRT	chr12	9007663	ACtCcTGAAAGAtGGTtgCtGAAGAGT	-	6
ACACGTGAAAGACGGTGACGGNNGRRT	chr12	29785361	AagCGTGAAAGAtttTGAtGGAAGAAT	-	6
ACACGTGAAAGACGGTGACGGNNGRRT	chr12	41255762	ACtCaTGtcAGAaGGTGACGGGGGAGT	+	5
ACACGTGAAAGACGGTGACGGNNGRRT	chr12	27155677	AaAgtTGtAAGACGGTGAgGaAAGGGT	-	6
ACACGTGAAAGACGGTGACGGNNGRRT	chr12	51765896	ACACtcGAAAGACaaTGAgGaAGGAAT	-	6
ACACGTGAAAGACGGTGACGGNNGRRT	chr12	62520105	AgACcTGtAAGAaaGTGtCGGCAGGGT	-	6
ACACGTGAAAGACGGTGACGGNNGRRT	chr12	69802891	ACACGTGtAgcACGGTGgCctCTGAAT	+	6
ACACGTGAAAGACGGTGACGGNNGRRT	chr12	83780176	ACACcTGAAAGgaGcTGACctATGAGT	+	6
ACACGTGAAAGACGGTGACGGNNGRRT	chr12	73279886	AtAaGTGAcAGAgGGaGACaGAAGAGT	-	6
ACACGTGAAAGACGGTGACGGNNGRRT	chr12	104467705	tCAaGTGAAAGAaGcTGgtGGCTGGGT	+	6
ACACGTGAAAGACGGTGACGGNNGRRT	chr12	80510766	ACACtTGAAAGACaaTGACatGAGAGT	-	5
ACACGTGAAAGACGGTGACGGNNGRRT	chr12	81979855	gCAgGaGAAAGAgaGaGACGGTGGGGT	+	6
ACACGTGAAAGACGGTGACGGNNGRRT	chr12	110947934	AtAaGTGAAAGAgGGaGgCaGAAGAGT	-	6
ACACGTGAAAGACGGTGACGGNNGRRT	chr12	121895695	AtAgGTGAAAGAgGGaGgCaGGAGAGT	-	6
ACACGTGAAAGACGGTGACGGNNGRRT	chr12	115671859	ACAacaGAAAGcCtGTGAaGGCAGAGT	-	6
ACACGTGAAAGACGGTGACGGNNGRRT	chr12	100145971	ggACtTGAAgGACGGTGAatGTGGGGT	+	6
ACACGTGAAAGACGGTGACGGNNGRRT	chr12	109573340	gggCGTGgAAGACGGgGACaGGTGAGT	-	6
ACACGTGAAAGACGGTGACGGNNGRRT	chr12	125342247	tCACaTtAAAGAaGtTGAtGGGAGAAT	-	6
ACACGTGAAAGACGGTGACGGNNGRRT	chr12	126756927	AtAaGTGAAAGAgtGaGACaGGGGGAT	-	6
ACACGTGAAAGACGGTGACGGNNGRRT	chr12	123454451	AgACGTGAAccACcGTGcCtGGCGGAT	+	6
ACACGTGAAAGACGGTGACGGNNGRRT	chr13	18192164	ACAgGgGAAgGAtGGgGACtGTGGGAT	-	6
ACACGTGAAAGACGGTGACGGNNGRRT	chr13	33250029	ACACtTGgAAGgCtGaGACGGGGGGAT	-	5
ACACGTGAAAGACGGTGACGGNNGRRT	chr13	29688984	ACAgGTGAcAGAgGGaGcCaGGAGAGT	+	6
ACACGTGAAAGACGGTGACGGNNGRRT	chr13	72637046	AaACtTcAAAaACaGTGACGaGGGAAT	+	6
ACACGTGAAAGACGGTGACGGNNGRRT	chr13	105054416	gCACtTGggAGACtGaGACGGGAGAAT	-	6
ACACGTGAAAGACGGTGACGGNNGRRT	chr13	109002572	AgACGTGAAtGtgGGTGAaaGGTGAGT	-	6
ACACGTGAAAGACGGTGACGGNNGRRT	chr13	114230266	ACAaGTGAAAGAgGGaGgCcGGGGGGT	-	5
ACACGTGAAAGACGGTGACGGNNGRRT	chr13	114255746	ACACtTGAgAGgCtGaGgCGGAAGGAT	-	6
ACACGTGAAAGACGGTGACGGNNGRRT	chr13	110096891	AaAgGTGAAAGACccTGAatGATGAAT	-	6
ACACGTGAAAGACGGTGACGGNNGRRT	chr14	25013759	ACAaGgaAAAGAtaGTGAaGGGTGAAT	+	6
ACACGTGAAAGACGGTGACGGNNGRRT	chr13	91736139	AgAaaaGAAAGAgGGTGAgGGATGAAT	+	6
ACACGTGAAAGACGGTGACGGNNGRRT	chr14	43321864	tCtCGTGAAAGACaGaaAtGGAGGGAT	+	6
ACACGTGAAAGACGGTGACGGNNGRRT	chr14	76920821	AacCcTGAtgGAaGGTGACGGGGGAAT	+	6
ACACGTGAAAGACGGTGACGGNNGRRT	chr14	90530574	ACAaGgGAAAGAgGGaGACaGGAGGGT	+	5
ACACGTGAAAGACGGTGACGGNNGRRT	chr14	81812156	gCAtGTGAAAGACaGTtgCaGGCGAGT	+	6
ACACGTGAAAGACGGTGACGGNNGRRT	chr14	104904236	cCAaGgtAAAGACtGTGACaGATGGGT	-	6
ACACGTGAAAGACGGTGACGGNNGRRT	chr14	98769918	cCACtTGAgAGgCGGTGgCGGGAGGAT	-	5
ACACGTGAAAGACGGTGACGGNNGRRT	chr15	23955544	gCACtTGgAAGgCGGaGgCGGGTGGAT	+	6
ACACGTGAAAGACGGTGACGGNNGRRT	chr14	105799836	ACAtGTGAAAGACatTGtCaaGAGAAT	+	6
ACACGTGAAAGACGGTGACGGNNGRRT	chr15	28187902	tCACaTGAAAtACaGTGAtGGAGGAAT	-	5
ACACGTGAAAGACGGTGACGGNNGRRT	chr15	29476687	ACACcTGgAAGcaGGgGACGaGTGAGT	+	6
ACACGTGAAAGACGGTGACGGNNGRRT	chr15	38803680	AgcCGTGAgAGACtGTaACaGGAGGAT	-	6
ACACGTGAAAGACGGTGACGGNNGRRT	chr15	52290529	ACAaGTGAAAGAaacaGAtGGTGGAAT	+	6
ACACGTGAAAGACGGTGACGGNNGRRT	chr15	52764836	ACACagGtAAGtCtGTGACGtCCGAGT	+	6
ACACGTGAAAGACGGTGACGGNNGRRT	chr15	56006804	AacCGTGAAtGAtGcTGAtGGCAGAAT	+	6
ACACGTGAAAGACGGTGACGGNNGRRT	chr15	53367301	ACcCtTGAAtGAaGGTGgaGGCTGGAT	-	6
ACACGTGAAAGACGGTGACGGNNGRRT	chr15	50355603	ACtgtTGAAAGACGGaGAgtGCGGAAT	+	6
ACACGTGAAAGACGGTGACGGNNGRRT	chr15	87663030	ctACtTGAgAGACtGaGACGGGAGAAT	+	6
ACACGTGAAAGACGGTGACGGNNGRRT	chr15	85337255	ACACGTGAgAaAgtGTGAaGcTGGGAT	-	6
ACACGTGAAAGACGGTGACGGNNGRRT	chr15	90623056	ACcaGaGAAgGgtGGTGACGGGGGAAT	-	6
ACACGTGAAAGACGGTGACGGNNGRRT	chr15	72077604	tCACtTGAAccggGGTGACGGCAGGGT	+	6
ACACGTGAAAGACGGTGACGGNNGRRT	chr15	92467045	ACAgGTGgcAGgaGGTGACaGAGGGGT	-	6
ACACGTGAAAGACGGTGACGGNNGRRT	chr15	94597235	tCAaGgGAAAcAaGGTGAaGGATGAAT	+	6
ACACGTGAAAGACGGTGACGGNNGRRT	chr16	9679471	ACAaGaGAAAGACGtTtggGGATGGGT	+	6
ACACGTGAAAGACGGTGACGGNNGRRT	chr16	61637	ACACGgctAgGAtGGTGACGaGCGAGT	+	6
ACACGTGAAAGACGGTGACGGNNGRRT	chr16	17775495	gCACGTGAAgGAgGGaGcCGtATGGAT	-	6
ACACGTGAAAGACGGTGACGGNNGRRT	chr15	97051928	ctACtTGAAAGACtGaGAtGGAAGGAT	+	6
ACACGTGAAAGACGGTGACGGNNGRRT	chr16	17971536	ACAgGaGAAAGAtGGaGAaGGAAGGAT	+	5
ACACGTGAAAGACGGTGACGGNNGRRT	chr16	65922119	gCcaGTGAAAGAgGaaGACGGGGGAAT	-	6
ACACGTGAAAGACGGTGACGGNNGRRT	chr16	51546177	cCACtgatAAGACGGTGAaGGATGGGT	+	6
ACACGTGAAAGACGGTGACGGNNGRRT	chr16	70284800	AaAaGTGAAttAaGGTtACGGTTGGGT	-	6
ACACGTGAAAGACGGTGACGGNNGRRT	chr17	2198570	AgACaTGAAAaAtGGgGAaGGACGGGT	+	6
ACACGTGAAAGACGGTGACGGNNGRRT	chr16	62048680	ACACGTGgtAGgCGGcGAgtGTAGGAT	+	6
ACACGTGAAAGACGGTGACGGNNGRRT	chr16	85524538	cCACGTGtggGAgGGTGAgGGTGGGGT	+	6
ACACGTGAAAGACGGTGACGGNNGRRT	chr17	3879266	cCAaGTGAcAGAtGGTGAgGcCTGGAT	-	6
ACACGTGAAAGACGGTGACGGNNGRRT	chr16	84188356	ACAtGgGAAAGAgGGaGACaGAAGAGT	-	5
ACACGTGAAAGACGGTGACGGNNGRRT	chr17	8233028	AaACcTGcAAGAaGaTGAaGGTTGAGT	+	6
ACACGTGAAAGACGGTGACGGNNGRRT	chr16	84389436	ACACaTGAcAcACaGTcAtGGTTGAAT	+	6
ACACGTGAAAGACGGTGACGGNNGRRT	chr17	14037978	tCACGTGAAAGctGtTGctGGGGGAGT	-	6
ACACGTGAAAGACGGTGACGGNNGRRT	chr17	12874169	AgAaGaaAAAGAgGcTGACGGTTGAGT	+	6
ACACGTGAAAGACGGTGACGGNNGRRT	chr17	32518156	ggACaaGAAAGAgGGTGAtGGCGGAGT	-	6
ACACGTGAAAGACGGTGACGGNNGRRT	chr17	28066107	ACACcTGAAAGAaGaTaAtaGTGGAGT	-	6
ACACGTGAAAGACGGTGACGGNNGRRT	chr17	17031552	ctACtTGAAAGACtGaGgCGGGGGGAT	-	6
ACACGTGAAAGACGGTGACGGNNGRRT	chr17	31874297	gCACtTtAAAGACGGaGgCaGGCGGAT	+	6
ACACGTGAAAGACGGTGACGGNNGRRT	chr17	35323890	ACAgaTGAAgGAtGGTGAaGGTGGAGT	+	5
ACACGTGAAAGACGGTGACGGNNGRRT	chr17	49065566	AtAaGTGAAAGAaGGaGACaGAAGAAT	-	5
ACACGTGAAAGACGGTGACGGNNGRRT	chr17	59585854	AgACtTGAcAGgCtGTGAaGGATGGGT	+	6
ACACGTGAAAGACGGTGACGGNNGRRT	chr17	56114803	AaAaGTGAAAGAgGGaGgCaGATGAAT	+	6
ACACGTGAAAGACGGTGACGGNNGRRT	chr17	61926435	ACtCcaGAAAGAaGGcGAaGGATGAGT	+	6
ACACGTGAAAGACGGTGACGGNNGRRT	chr17	73742896	AaACcTGAAAGAgGGTtACGGAGGAAT	+	4
ACACGTGAAAGACGGTGACGGNNGRRT	chr17	77766557	cCACaTGgAAGAgGGaGACtGCAGAGT	-	6
ACACGTGAAAGACGGTGACGGNNGRRT	chr17	72650712	tgACcTGAAAGtCGGTGAtGGTGGAGT	-	5
ACACGTGAAAGACGGTGACGGNNGRRT	chr18	7943595	AgcCcTaAAAGAaGGTGACGGCAGGGT	+	5
ACACGTGAAAGACGGTGACGGNNGRRT	chr18	23738262	ACACtTGcAAGctGaTGAtGGGTGGGT	+	6
ACACGTGAAAGACGGTGACGGNNGRRT	chr18	22684182	ACAgGgtAAAGACaGaGAaGGAAGAAT	-	6
ACACGTGAAAGACGGTGACGGNNGRRT	chr18	4174060	ACtgGaGAAAGAgGGTGgaGGTTGAGT	-	6
ACACGTGAAAGACGGTGACGGNNGRRT	chr18	32903708	AaACcTaAAAGACtGaGACaGGAGGAT	-	6
ACACGTGAAAGACGGTGACGGNNGRRT	chr18	9414274	cCACcTGAAAGACaaTGAaGcTGGAAT	+	6
ACACGTGAAAGACGGTGACGGNNGRRT	chr18	42451381	cCACGaGAAgGAtGGTGttGGGGGGAT	+	6
ACACGTGAAAGACGGTGACGGNNGRRT	chr18	80127508	AgAaGTGAAAGAaaGTGAaaGATGGAT	-	6
ACACGTGAAAGACGGTGACGGNNGRRT	chr18	58766025	AgAatTtAAAaACaGTGACGGCAGAAT	-	6
ACACGTGAAAGACGGTGACGGNNGRRT	chr18	68694171	tCACcTGcAAcAtGGTGACtGGGGGGT	-	6
ACACGTGAAAGACGGTGACGGNNGRRT	chr18	72439390	AaAttTGAAAGAtGGTGgCaGGAGAGT	-	6
ACACGTGAAAGACGGTGACGGNNGRRT	chr19	2237822	ACACaaGAAcaACGGTcACaGCGGGGT	-	6
ACACGTGAAAGACGGTGACGGNNGRRT	chr19	29774198	AgAtGTGAAAGAgGGTGACcaTAGAAT	-	5
ACACGTGAAAGACGGTGACGGNNGRRT	chr19	8833390	AgAacTGAAAGACcGTGgtGGGAGAAT	-	6
ACACGTGAAAGACGGTGACGGNNGRRT	chr19	22786589	ctACtTGAAAGgCtGTGACaGGAGAAT	-	6
ACACGTGAAAGACGGTGACGGNNGRRT	chr19	42459477	AtAgGTGAAAGAgGGaGgCaGGAGAGT	+	6
ACACGTGAAAGACGGTGACGGNNGRRT	chr20	46160784	AtgaGTGAcAcACGGTGAgGGCTGAAT	+	6
ACACGTGAAAGACGGTGACGGNNGRRT	chr20	41411009	gCAaGTGgAAGAaaGTGAgGGAAGAGT	+	6
ACACGTGAAAGACGGTGACGGNNGRRT	chr20	42649740	ACAtGaGAgAGAaGtTGAgGGAGGGAT	-	6
ACACGTGAAAGACGGTGACGGNNGRRT	chr20	49654363	cCACaTGcAAGACGGaaACtGCAGGGT	+	6
ACACGTGAAAGACGGTGACGGNNGRRT	chr21	6703393	ACACtTGAgAGgCtGaGgCGGGCGGAT	-	6
ACACGTGAAAGACGGTGACGGNNGRRT	chr21	7030462	ACACtTGAgAGgCtGaGgCGGGCGGAT	-	6
ACACGTGAAAGACGGTGACGGNNGRRT	chr21	5535240	ACACtTGAgAGgCtGaGgCGGGCGGAT	-	6
ACACGTGAAAGACGGTGACGGNNGRRT	chr21	7412241	ACACtTGAgAGgCtGaGgCGGGCGGAT	-	6
ACACGTGAAAGACGGTGACGGNNGRRT	chr20	54253970	ACACcTGAgAGcaccTGACGGGTGGGT	+	6
ACACGTGAAAGACGGTGACGGNNGRRT	chr20	52724353	ACACagGAAAcAaGcTGAaGGTTGAGT	+	6
ACACGTGAAAGACGGTGACGGNNGRRT	chr20	62992822	ACACGTGtAtGgatGTGACcGTCGGGT	+	6
ACACGTGAAAGACGGTGACGGNNGRRT	chr21	10345840	ACAgGgGAAgGAtGGgGACtGTGGGAT	+	6
ACACGTGAAAGACGGTGACGGNNGRRT	chr21	6285705	ACACtTGAgAGgCtGaGgCGGGCGGAT	+	6
ACACGTGAAAGACGGTGACGGNNGRRT	chr21	27952660	ACAaaaGAAtGAgGGTGAaGGTAGGGT	+	6
ACACGTGAAAGACGGTGACGGNNGRRT	chr21	28980371	ACACaTaAAAcAaGGTtAtGGTGGGGT	+	6
ACACGTGAAAGACGGTGACGGNNGRRT	chr22	17034107	ACAgGgGAAgGAtGGgGACtGTGGGAT	-	6
ACACGTGAAAGACGGTGACGGNNGRRT	chr22	30327995	ACACGcGAAtGACcaTcACtGATGAAT	-	6
ACACGTGAAAGACGGTGACGGNNGRRT	chr22	37750541	tCAgGTGgAAGACGGgGtgGGCAGAAT	+	6
ACACGTGAAAGACGGTGACGGNNGRRT	chr22	37160593	AaACGTGAAAGgCcaaGgCGGGTGGAT	+	6
ACACGTGAAAGACGGTGACGGNNGRRT	chr21	40209114	cCAaGTGgAAGACGaTGAgGGGAGAAT	-	5
ACACGTGAAAGACGGTGACGGNNGRRT	chr21	40830203	ACtCaTGAAgGAaGGTGAgaGGGGAGT	+	6
ACACGTGAAAGACGGTGACGGNNGRRT	chrX	3022691	ACACaTtAAAGACaGTGtCtGCTGAGT	+	5
ACACGTGAAAGACGGTGACGGNNGRRT	chrX	1541054	ACACGTaAAAtAaGGTtAtGtATGGAT	-	6
ACACGTGAAAGACGGTGACGGNNGRRT	chr22	45992292	ACtgGTGgcAGAaGGaGACGGAGGGGT	+	6
ACACGTGAAAGACGGTGACGGNNGRRT	chrX	2179971	AgtgGTGAgAGAaGGTGAgGGAAGGGT	-	6
ACACGTGAAAGACGGTGACGGNNGRRT	chr22	46409311	cCACGTGgctGACtGTGAgGGCTGGAT	-	6
ACACGTGAAAGACGGTGACGGNNGRRT	chrX	5109266	ACACcTGAAAGAtGaTGgttGGTGAGT	-	6
ACACGTGAAAGACGGTGACGGNNGRRT	chrX	16852246	gCACtTGAAAGtCGGgGACaaGAGAGT	-	6
ACACGTGAAAGACGGTGACGGNNGRRT	chrX	24100187	AgAaGTGAAAGAgGGaGgCaGAAGAGT	-	6
ACACGTGAAAGACGGTGACGGNNGRRT	chrX	49615377	AggaGTGAAAGAgGGaGACaGAAGGGT	-	6
ACACGTGAAAGACGGTGACGGNNGRRT	chrX	68826991	cCtCtTGAAgGACaGTGAgGGAAGAGT	+	6
ACACGTGAAAGACGGTGACGGNNGRRT	chrX	56832884	AgctGTGAAAGACtGTGcCtGAGGAAT	-	6
ACACGTGAAAGACGGTGACGGNNGRRT	chrX	80798683	gCACtTGAgAGACaGaGAtGGGAGGAT	+	6
ACACGTGAAAGACGGTGACGGNNGRRT	chrX	119458789	ACAaGTGgAAGAgGaaGACaGAAGAAT	+	6
ACACGTGAAAGACGGTGACGGNNGRRT	chrX	117490314	tCAgtTGAAAGAtGGTGAgGtCTGAAT	-	6
ACACGTGAAAGACGGTGACGGNNGRRT	chrX	110098886	ctACGTGAAAGgCtGaGACaGCAGAAT	-	6
ACACGTGAAAGACGGTGACGGNNGRRT	chrX	152437150	tCACGgGAAAGACtGacAaGGCAGGAT	+	6
ACACGTGAAAGACGGTGACGGNNGRRT	chrX	142103398	AtAtGTGAAAaAgGGaGACaGGAGAGT	+	6
ACACGTGAAAGACGGTGACGGNNGRRT	chr3_KI270782v1_alt	71222	cCACcTGAAAGgCtGaGAtGGGAGAAT	-	6
ACACGTGAAAGACGGTGACGGNNGRRT	chr17_GL000205v2_random	173598	ACACtTGAgAGgCtGaGgCGGGCGGAT	-	6
ACACGTGAAAGACGGTGACGGNNGRRT	chrY	7809968	ACACaTGAAgcACtGTGACatAAGGGT	-	6
ACACGTGAAAGACGGTGACGGNNGRRT	chrUn_GL000195v1	105080	ACACtTGAgAGgCtGaGgCGGGCGGAT	+	6
ACACGTGAAAGACGGTGACGGNNGRRT	chr4_KI270788v1_alt	114910	ACcCaTGAAAtACaGTGACtGAAGAGT	+	5
ACACGTGAAAGACGGTGACGGNNGRRT	chr7_KI270803v1_alt	788298	ACttGgGAcAGAaGGTGAaGGTGGAAT	-	6
ACACGTGAAAGACGGTGACGGNNGRRT	chr7_KI270803v1_alt	798565	ACttGgGAcAGAaGGTGAaGGTGGAAT	-	6
ACACGTGAAAGACGGTGACGGNNGRRT	chr8_KI270821v1_alt	435637	tCACGTGAgAaAtGcTGACaGAAGAAT	-	6
ACACGTGAAAGACGGTGACGGNNGRRT	chr8_KI270821v1_alt	632566	tCACGTGAgAaAtGcTGACaGAAGAAT	+	6
ACACGTGAAAGACGGTGACGGNNGRRT	chr14_KI270846v1_alt	267605	ACAtGTGAAAGACatTGtCaaGAGAAT	+	6
ACACGTGAAAGACGGTGACGGNNGRRT	chr8_KI270811v1_alt	33788	ACACcTGAgAGgCGGTGACacAGGAGT	-	5
ACACGTGAAAGACGGTGACGGNNGRRT	chr15_KI270905v1_alt	321343	tCACaTGAAAtACaGTGAtGGAGGAAT	-	5
ACACGTGAAAGACGGTGACGGNNGRRT	chr15_KI270905v1_alt	1752184	ACACcTGgAAGcaGGgGACGaGTGAGT	+	6
ACACGTGAAAGACGGTGACGGNNGRRT	chr6_GL000251v2_alt	3379112	AaACGTGtAAGggGGgGgCGGAGGAAT	-	6
ACACGTGAAAGACGGTGACGGNNGRRT	chr6_GL000252v2_alt	3149461	AaACGTGtAAGggGGgGgCGGAGGAAT	-	6
ACACGTGAAAGACGGTGACGGNNGRRT	chr6_GL000254v2_alt	3243762	AaACGTGtAAGggGGgGgCGGAGGAAT	-	6
ACACGTGAAAGACGGTGACGGNNGRRT	chr6_GL000255v2_alt	3157660	AaACGTGtAAGggGGgGgCGGAGGAAT	-	6
