# Supplementary figures and images for: 稲盛和夫 京セラ会長 : サービス産業中心でいいのか もう一度ものづくりに目覚めよ (The Interviews 1913‣2013 週刊ダイヤモンド100周年経営者発言史) -- (経営者とその時代)
Source: eLife journal article supplement (doi:10.7554/elife.51662), 2014-12-28

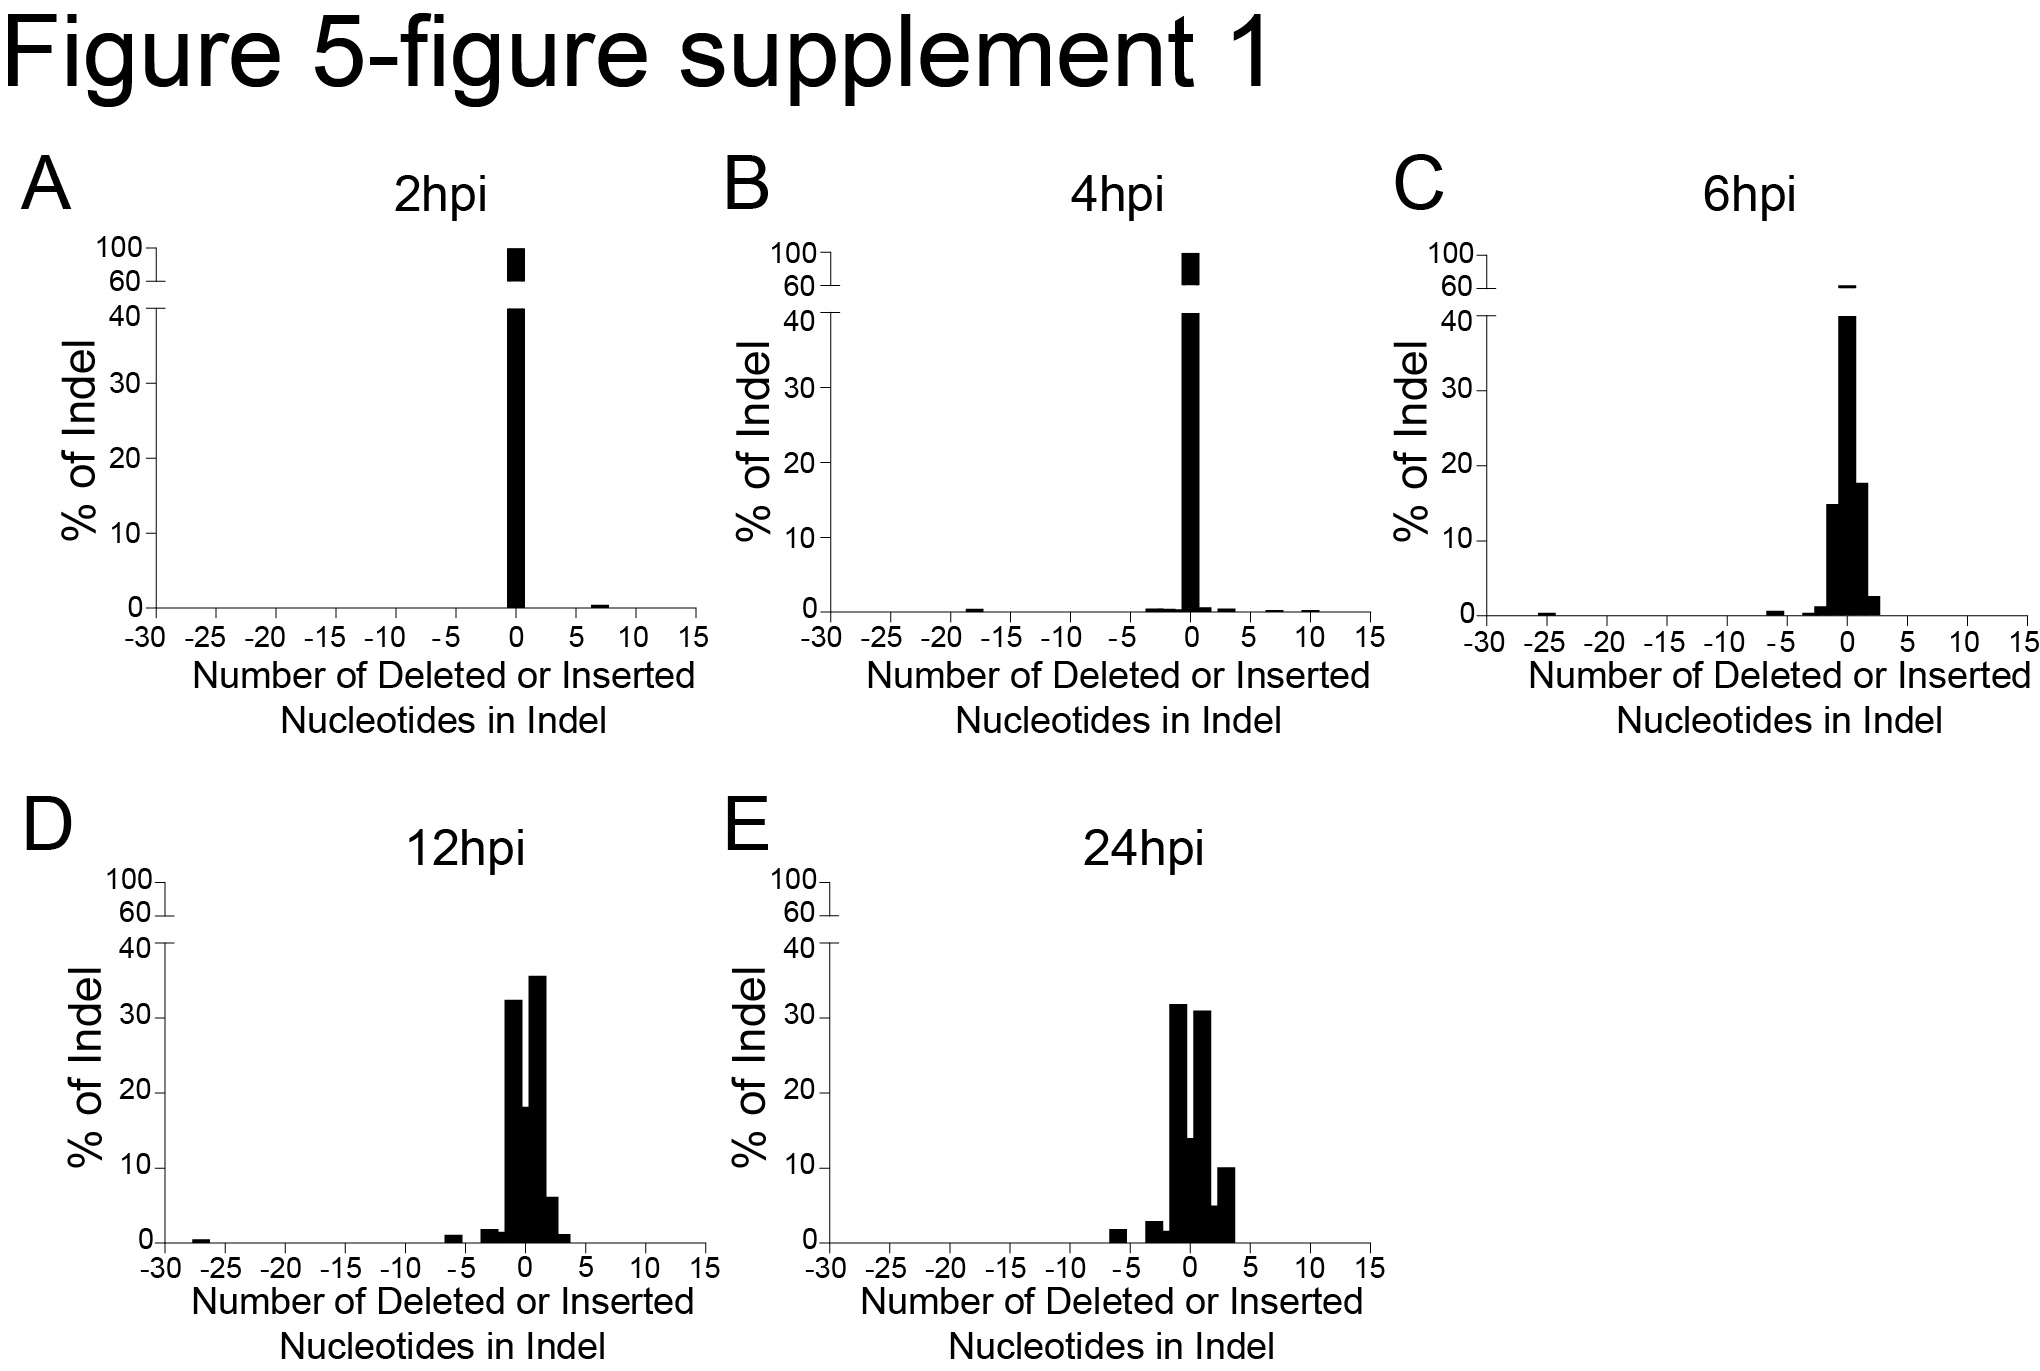

Supplement: supp [file elife-51662-supp-v1.zip › elife_poa_e51662_Figure_5_figure_supplement_1.jpg]

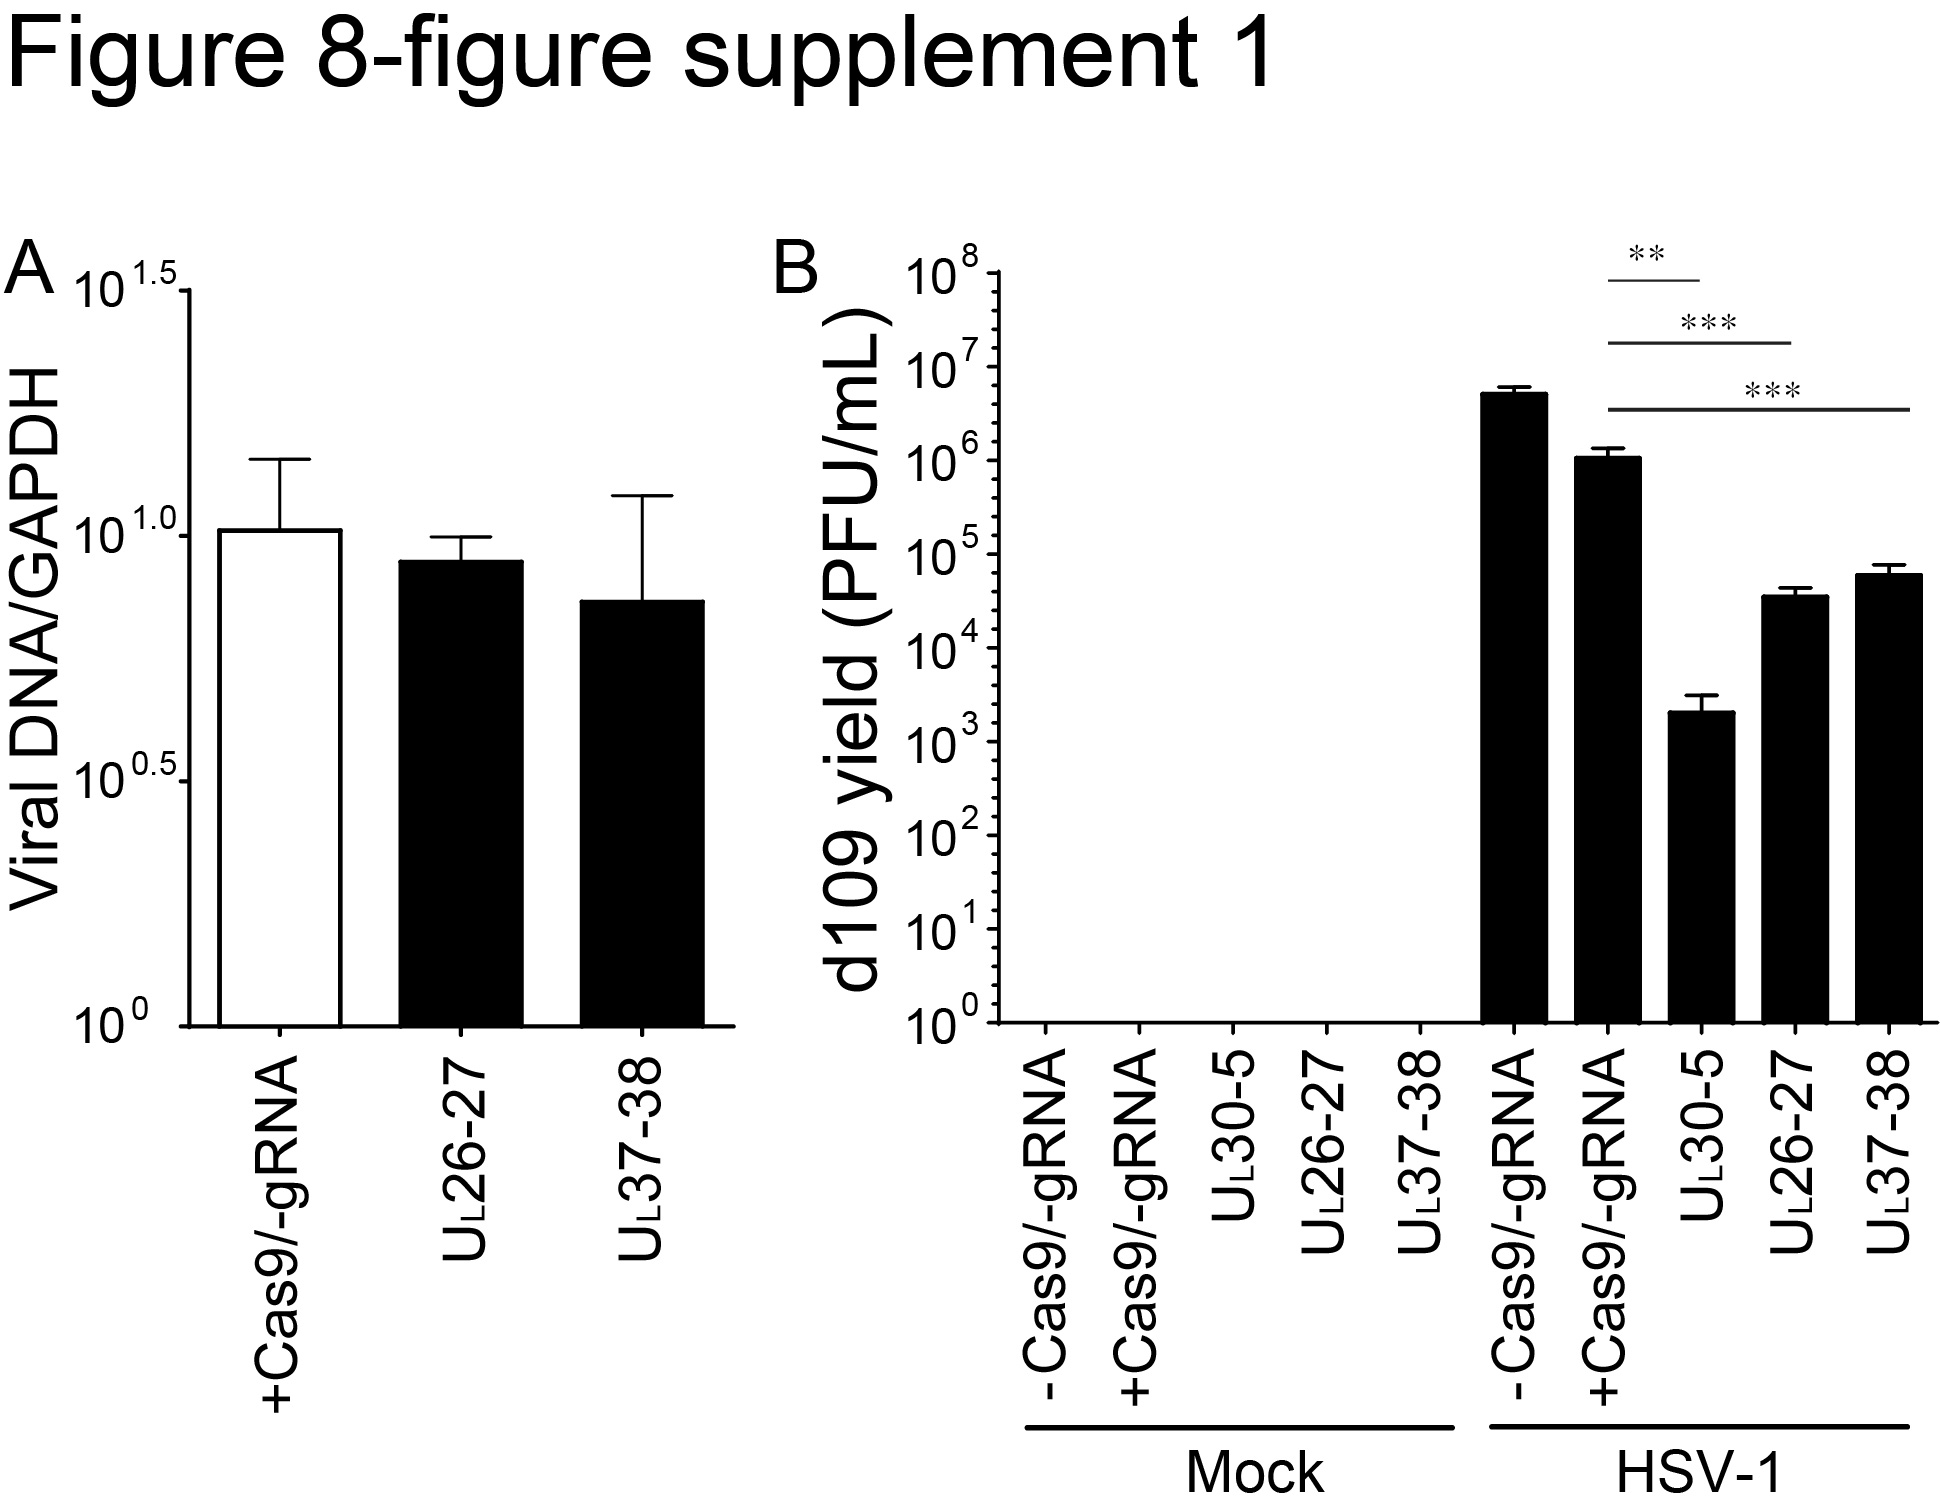

Supplement: supp [file elife-51662-supp-v1.zip › elife_poa_e51662_Figure_8_figure_supplement_1.jpg]
